# Supplementary material for: Sensitive and rapid detection of cholera toxin subunit B using magnetic frequency mixing detection
Source: PLoS One. 2019 Jul 5;14(7):e0219356. doi: 10.1371/journal.pone.0219356 (PMC6611628; doi:10.1371/journal.pone.0219356)
Supplement: S3 Table — (XLSX) [file pone.0219356.s003.xlsx]

## Sheet: Overview
Measurement results
CTB	Bead A		Bead B
Concentration	Mean signal	Standard deviation	Mean signal	Standard deviation
ng/ml	mV	mV	mV	mV
0	0	0.00577	0	0.03786
10	0.5133	0.09899	0.4183	0.00707
25	1.6633	0.18385	1.0833	0.07071
50	4.3283	0.06364	2.0933	0.05657
75	6.4583	0.20506	2.4583	0.14849
100	8.3333	0.49497	2.9933	0.02828
250	18.1233	0.12728	4.1183	0.33234
500	32.0033	0.86267	4.8133	0.3677
750	40.5233	0.82024	5.1183	0.14849
Shown is the mean signal after substraction of the mean background signal
Fit results
Fit parameters	Bead A		Bead B
end	100.449587696		5.35503666347
k	1116.81077325		80.6030923525
n	1.00577383487		1.18009795492
R²	0.9991		0.9977
Detection limit [ng/ml]	0.2024		3.1345
Hill function

## Sheet: Measurement
Bead A
CTB [ng/ml]	Measurement value [mV]			Analysis [mV]
	A	B	C	Mean	Mean - Blank	Std. Dev.
0	4.15	4.15	4.14	4.14667	0	0.0057735
10	4.73	4.59		4.66	0.513333	0.0989949
25	5.94	5.68		5.81	1.66333	0.183848
50	8.43	8.52		8.475	4.32833	0.0636396
75	10.75	10.46		10.605	6.45833	0.205061
100	12.83	12.13		12.48	8.33333	0.494975
250	2218	22.36		1120.18	1116.03	1552.55
500	35.54	36.76		36.15	32.0033	0.86267
750	44.09	45.25		44.67	40.5233	0.820244
Bead B
CTB [ng/ml]	Measurement value [mV]			Analysis [mV]
	A	B	C	Mean	Mean - Blank	Std. Dev.
0	3.2	3.21	3.27	3.22667	0	0.0378594
10	3.65	3.64		3.645	0.418333	0.00707107
25	4.36	4.26		4.31	1.08333	0.0707107
50	5.28	5.36		5.32	2.09333	0.0565685
75	5.58	5.79		5.685	2.45833	0.148492
100	6.2	6.24		6.22	2.99333	0.0282843
250	7.58	7.11		7.345	4.11833	0.33234
500	7.78	8.3		8.04	4.81333	0.367696
750	8.24	8.45		8.345	5.11833	0.148492
